# Supplementary material
Source: publisher site journal article supplement (https://www.dovepress.com/article/229246)
Supplement: Supplementary file 1 [file get_supplementary_file.php]

Figure S1 Design of nutrition education in the experimental and control group

Table S1 Scenario of nutrition education

| **Part** | **Form** | **Didactic tools** | **Methods/topics** | **Aims and benefits/weaknesses** | |
| --- | --- | --- | --- | --- | --- |
| 1. | Lecture | Multimedia presentation (slides including diagrams and photographs) | Part 1 consisted in presenting a lecture by a trainer on the following issues:   1. Optimal distribution of macronutrients in diet 2. Proteins – types (animal and plant origin), food sources and effect on health and glycemia 3. Lipids – types (saturated and unsaturated), food sources and effect on health and glycemia 4. Carbohydrates – types (simple and complex), food sources and effect on health and glycemia 5. Glycemic index (GI) – definition, function and factors modifying its value 6. Sweeteners – types (artificial and natural) and their effect on health and glycemia 7. Food labels – nutritional value and composition 8. Food labels – nutrition facts: ‘sugar free’ and ‘no added sugar’ 9. Salt - food sources and effect on health 10. Beverages – effect on health and glycemia 11. Carbohydrate exchange (CE) – definition and method of calculation 12. Protein-fat exchange (PFE) – definition and method of calculation | The main aim of this part of education was to convey theoretical knowledge concerning the most important issues of nutrition.  Implementing a large amount of issues over a short period is the advantage of the expository method.  The lack of interaction between the trainer and the trainees and the inability to verify to what degree the information was understood and memorized is a disadvantage of the study. | |
| 2. | ‘True-false’ quiz | Multimedia presentation (slides with true or false statements and photographs of labels, food products and dishes) | Part 2 consisted in conducting a discussion basing on ‘true-false’ quiz, which included various statements (photographs were additionally attached to some statements). The quiz was divided into three thematic modules (A – composing meals, B – label reading, C – counting exchanges).  In module A the participants were supposed to decide together whether a statement is true or false and to justify their choice.  In module B, basing on photographs of labels the participants were to decide whether a product is healthy or unhealthy and to justify their choice.  In the last module the participants were supposed to determine the exchange counts basing on data from labels or photographs of products and dishes. Then they could verify the answer with VitaScale application.   1. **How to compose meals correctly?** 2. Calorie content of macronutrients   Example: ‘1 g of fat has a higher calorie content than 1 g of proteins’   1. The effect of various dishes on postprandial glycemia   Example: ‘Eating scrambled eggs with bacon will soon result in hyperglycemia’   1. Suggestions of meals   Example: ‘Cornflakes with cow milk are a good idea of breakfast’   1. Comparing GI values of food products   Example: ‘Boiled carrot has a higher glycemic index than raw carrot’   1. **Is this a healthy product?** 2. Composition of various food products   Example: a product with a long list of ingredients; product in which ‘sugar’ is the first ingredient listed   1. Nutritional value of food products   Example: a label with a high concentration of saturated fatty acids; a label with a high carbohydrate content and low fiber content; a label with high salt content   1. **How many exchanges will that be?** 2. Packaging of various food products   Example: a label with nutritional value calculated into a portion of the product; a label with nutritional value calculated only into 100 g of the product (unassisted calculation of the portion)   1. Photographs of products and dishes   Example: a medium-sized banana, a glass of boiled groats, a plate of spaghetti, a medium-sized pork chop (referred to the size of a palm or cutlery) | | The main aim of this part consisted in the practical application and revision of acquired theoretical knowledge.  Detailed aims included:  - stimulating trainees to ask questions,  - encouraging trainees to search for answers independently,  - solving real problems,  - developing the ability to think logically via problem-centered teaching and showing cause-result relationships,  - strengthening motivation via positive assessment of accomplishments, building the feeling of self-worth and teaching positive thinking.  The advantages of this form of education were: the possibility of trainer-trainees interaction and higher attractiveness of the method because of the implementation of additional didactic measures, ie:  - packaging of various food products,  - photographs of labels, products and dishes,  - VitaScale multimedia application used for calculating exchanges.  A relatively long duration of the training which may result in decreasing the concentration in participants is a drawback of this form of educating. | |
